# Supplementary material for: Sustainable oxidation of cyclohexane catalyzed by a VO(acac)2-oxalic acid tandem: the electrochemical motive of the process efficiency
Source: Royal Society of Chemistry journal article supplement (doi:10.1039/d0ra00495b), 2020-01-01
Supplement: d0ra00495b1.pdf [file d0ra00495b1.pdf]

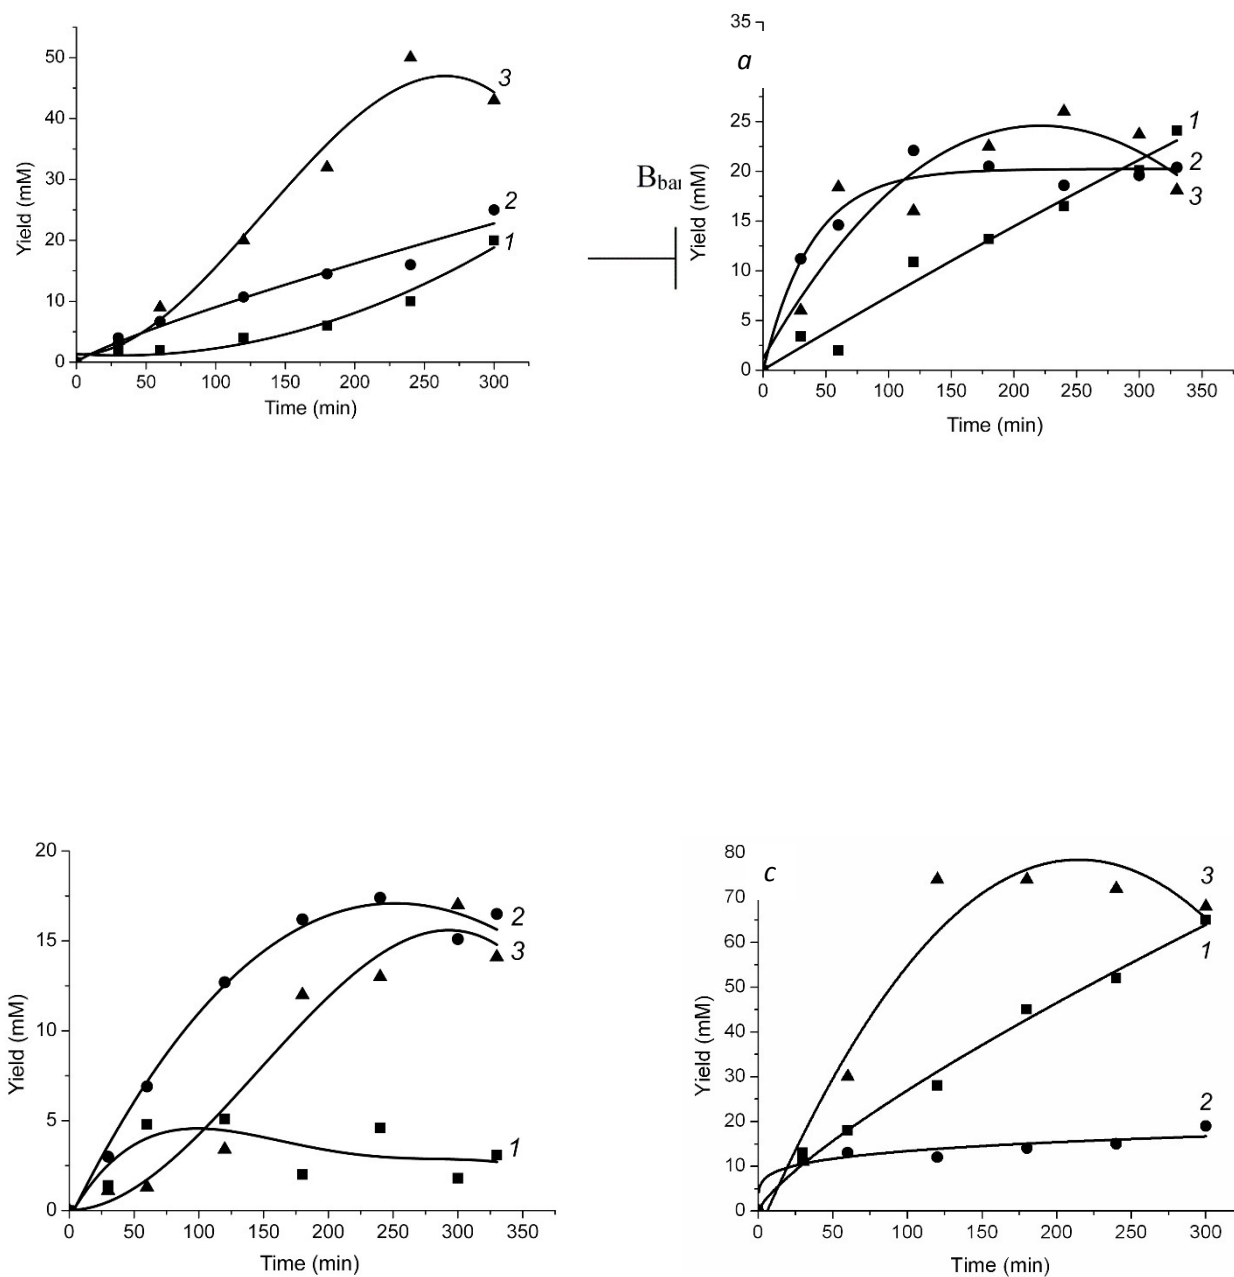

Fig. S1. The kinetics of C<sub>6</sub>H<sub>11</sub>OH (1), C<sub>6</sub>H<sub>10</sub>(O) (2) and C<sub>6</sub>H<sub>11</sub>OOH (3) accumulation upon C<sub>6</sub>H<sub>12</sub> oxidation by H<sub>2</sub>O<sub>2</sub>, MeCN, 40 °C.

Reaction conditions: (a), (b), (d): [C<sub>6</sub>H<sub>12</sub>]<sub>0</sub> = [H<sub>2</sub>O<sub>2</sub>]<sub>0</sub> = 1.8 M; (c): [C<sub>6</sub>H<sub>12</sub>]<sub>0</sub> = 0.36 M, [H<sub>2</sub>O<sub>2</sub>]<sub>0</sub> = 1.8 M. (a), (b), (c): [VO(acac)<sub>2</sub>]<sub>0</sub> = 0.06 × 10<sup>-3</sup> M; (d): [VO(acac)<sub>2</sub>]<sub>0</sub> = 0.6 × 10<sup>-3</sup> M; (a), (d): [H<sub>2</sub>C<sub>2</sub>O<sub>4</sub>]<sub>0</sub> = 50 × 10<sup>-3</sup> M; (b), (c): [H<sub>2</sub>C<sub>2</sub>O<sub>4</sub>]<sub>0</sub> = 5 × 10<sup>-3</sup> M.

Fig. S2. The relationships between VO(acac)<sub>2</sub>/OxalH molar ratios and the resulted solutions pH.

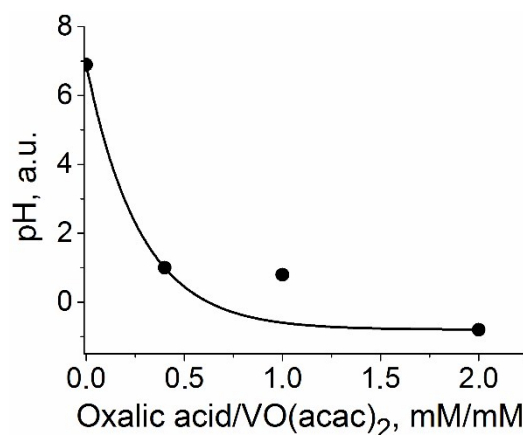

Fig. S3. Relationships between ORP of VO(acac)<sub>2</sub>-based system and pH in dependence of H<sub>2</sub>O<sub>2</sub> added.

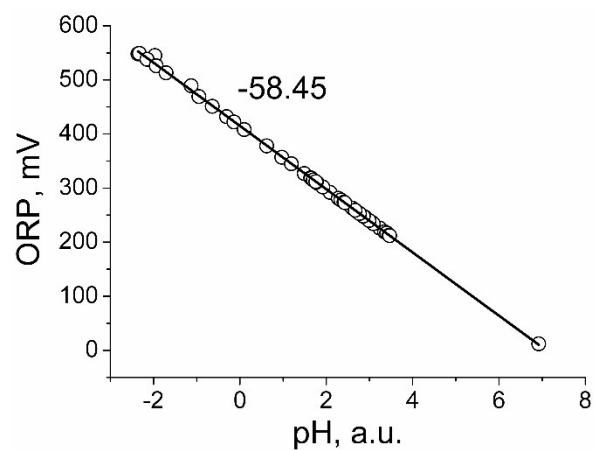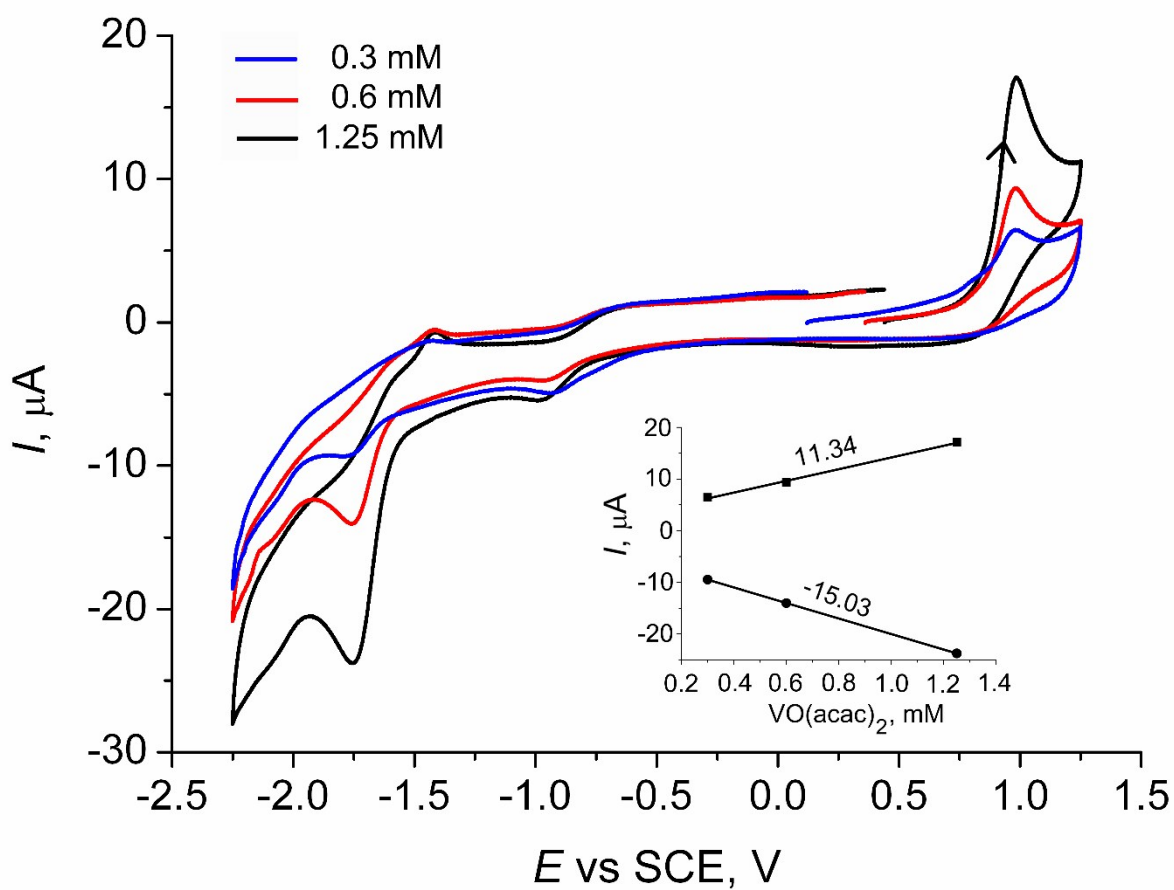

Fig. S4. CV of  $\text{VO}(\text{acac})_2$  solutions (anodic scans) taken for various  $\text{VO}(\text{acac})_2$  content (initial concentration of  $\text{VO}(\text{acac})_2$  in mM is indicated by the respective color), MeCN, 20 °C.  
*Inset:* the height of 0.98 V (squares) and -1.75 V (circles) peaks in dependence of  $\text{VO}(\text{acac})_2$  concentration.

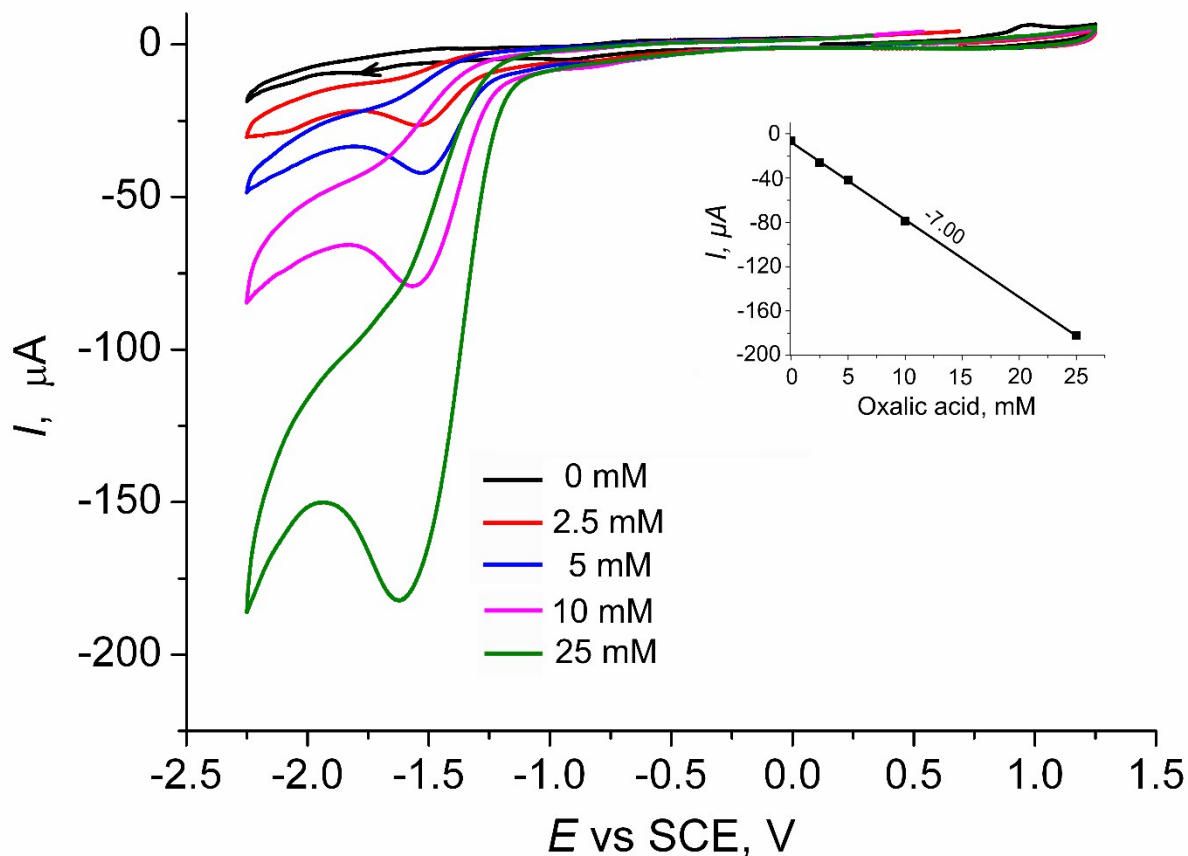

Fig. S5. CV of  $\text{VO}(\text{acac})_2 + \text{OxalH}$  solutions (anodic scans) taken in dependence of  $\text{H}_2\text{C}_2\text{O}_4$  content (concentration of  $\text{VO}(\text{acac})_2$  was equal 1.25 mM; initial concentration of OxalH in mM is indicated by the respective color), MeCN, 20 °C.  
*Inset:* the height of -1.55 V peak alteration in dependence of OxalH concentration.

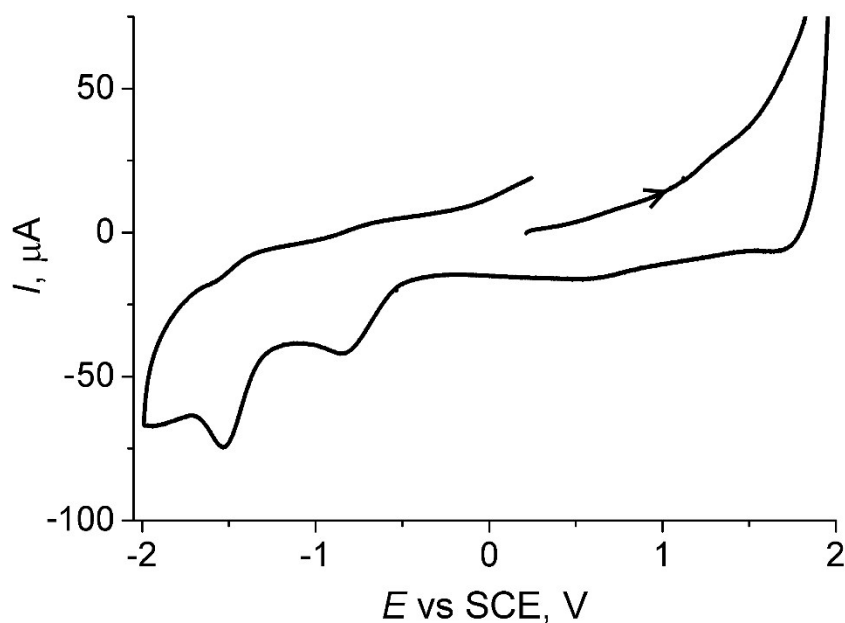

Fig. S6. CV of 2mM OxalH solutions, MeCN, 20 °C (anodic scans).

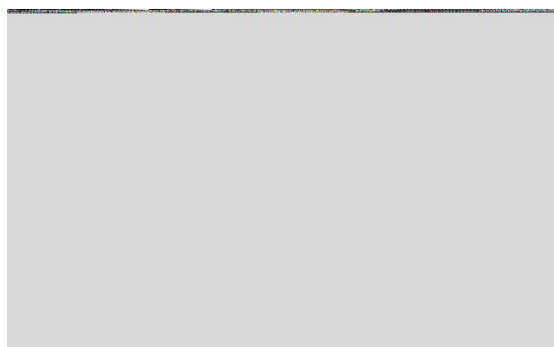

Scheme S1. The principal electrical scheme for measuring low-frequency complex dielectric spectra: dispersive power capacitor ( $B, n$ ) and parallel ( $R_V C_V$ ) circuit.

Parallel  $R_V C_V$  circuit characterizes the bulk impedance of solution under study: electrical resistance and dielectric polarization.

Dispersive capacitor is characterized by fractional power law dispersion with small exponent  $n-1$  according to the expression

$$C^*(\omega) = C_1(\omega) - jC_2(\omega) = B\{\sin(\omega t) - j\cos(\omega t)\}\omega^{n-1}$$

and represents dielectric response of double electrical layers formed near both solution-metal interfaces of filled up cell. Full impedance of this electrical equivalent electrical circuit could be written in the form:

$$\bar{Z}(\omega) = Z_1(\omega) - jZ_2(\omega) = \frac{1}{B\{\cos(\omega t) + j\sin(\omega t)\}\omega^n} + \frac{R_V}{1 + j\omega R_V C_V}$$

Thereby complex capacity of the circuit can be expressed as:

$$C^*(\omega) = C_1(\omega) - jC_2(\omega) = \left\{ \frac{1}{B\{\sin(\omega t) - j\cos(\omega t)\}\omega^{n-1}} + \frac{j\omega R_V}{1 + j\omega R_V C_V} \right\}^{-1}$$
